# Supplementary material
Source: PubMed Central journal article supplement (PMC3346348)
Supplement: supp_78.10.3778_AEM07794-11_supplemental.pdf [file supp_78.10.3778_AEM07794-11_supplemental.pdf]

Table S1: Collection details of *V. parahaemolyticus* strains isolated from the Great Bay Estuary in New Hampshire. Strain numbers in Fig 1 lack the prefix “G.”

| Strain(s) | Date isolated | Site <sup>a</sup> | Source | Temperature (°C) <sup>b</sup> | Salinity (ppt) <sup>b</sup> | Dissolved oxygen (mg/L) <sup>b</sup> | trh | tdh |
|-----------|---------------|-------------------|--------|-------------------------------|-----------------------------|--------------------------------------|-----|-----|
| G4        | 6/27/2007     | NI                | Water  | 20.25                         | 25.57                       | 8.53                                 | -   | -   |
| G6        | 6/27/2007     | OR                | Water  | 23.77                         | 22.37                       | 7.49                                 | -   | -   |
| G7        | 6/27/2007     | NI                | Oyster | 20.25                         | 25.57                       | 8.53                                 | -   | -   |
| G8        | 6/27/2007     | NI                | Water  | 17.14                         | 25.57                       | 8.53                                 | -   | -   |
| G10       | 7/10/2007     | NI                | Water  | 17.14                         | 29.36                       | 7.80                                 | -   | -   |
| G12       | 7/10/2007     | NI                | Oyster | 17.14                         | 29.36                       | 7.80                                 | -   | -   |
| G23       | 7/30/2007     | FP                | Oyster | 23.68                         | 25.32                       | 7.93                                 | -   | -   |
| G25       | 7/30/2007     | FP                | Oyster | 23.68                         | 25.32                       | 7.93                                 | -   | -   |
| G31       | 7/30/2007     | OR                | Oyster | 22.85                         | 24.19                       | 7.70                                 | -   | -   |
| G43       | 7/30/2007     | NI                | Oyster | 24.00                         | 27.05                       | 7.90                                 | -   | -   |
| G46       | 7/30/2007     | NI                | Water  | 24.00                         | 27.05                       | 6.37                                 | -   | -   |
| G61       | 7/25/2007     | NI                | Water  | 21.36                         | 27.20                       | 6.37                                 | -   | -   |
| G69       | 7/25/2007     | OR                | Oyster | 20.38                         | 24.05                       | 7.93                                 | -   | -   |
| G74       | 8/13/2007     | OR                | Oyster | 22.86                         | 27.32                       | 6.68                                 | -   | -   |
| G79       | 8/13/2007     | NI                | Oyster | 21.70                         | 29.73                       | 7.89                                 | -   | -   |
| G91       | 8/27/2007     | NI                | Oyster | 21.70                         | 29.73                       | 5.20                                 | -   | -   |
| G95       | 8/27/2007     | NI                | Oyster | 21.70                         | 29.73                       | 5.20                                 | -   | -   |
| G145      | 9/11/2007     | OR                | Oyster | 18.84                         | 28.59                       | 8.04                                 | -   | -   |
| G149      | 9/11/2007     | OR                | Water  | 18.84                         | 28.59                       | 8.04                                 | -   | -   |
| G151      | 9/11/2007     | OR                | Water  | 18.84                         | 28.59                       | 8.04                                 | -   | -   |
| G227      | 10/9/2007     | OR                | Oyster | 16.69                         | 31.38                       | 8.76                                 | -   | -   |
| G235      | 10/9/2007     | OR                | Water  | 16.69                         | 31.38                       | 9.69                                 | -   | -   |
| G237      | 10/9/2007     | NI                | Oyster | 16.34                         | 31.55                       | 8.85                                 | -   | -   |
| G242      | 10/22/2007    | OR                | Oyster | 14.88                         | 23.63                       | 10.36                                | -   | -   |
| G246      | 10/22/2007    | NI                | Water  | 14.64                         | 26.94                       | 11.14                                | -   | -   |
| G251      | 10/22/2007    | NI                | Oyster | 14.64                         | 26.94                       | 9.66                                 | -   | -   |
| G255      | 10/22/2007    | OR                | Water  | 14.88                         | 23.63                       | 10.36                                | -   | -   |
| G259      | 11/5/2007     | OR                | Oyster | 8.76                          | 23.41                       | 7.40                                 | -   | -   |
| G277      | 12/5/2007     | NI                | Oyster | 1.91                          | 27.23                       | 7.45                                 | -   | -   |
| G300      | 6/4/2008      | NI                | Water  | 17.69                         | 24.59                       | 7.60                                 | -   | -   |
| G301      | 6/4/2008      | NI                | Water  | 17.69                         | 24.59                       | 7.60                                 | -   | -   |
| G315      | 6/4/2008      | NI                | Oyster | 17.69                         | 24.59                       | 8.07                                 | -   | -   |
| G316      | 6/4/2008      | OR                | Oyster | 16.17                         | 26.19                       | 7.23                                 | -   | -   |
| G317      | 6/4/2008      | OR                | Oyster | 16.17                         | 26.19                       | 7.23                                 | -   | -   |
| G320      | 6/18/2008     | OR                | Oyster | 20.80                         | 23.60                       | 8.01                                 | -   | -   |
| G325      | 6/18/2008     | OR                | Oyster | 20.80                         | 23.60                       | 8.01                                 | -   | -   |
| G335      | 6/18/2008     | NI                | Water  | 19.52                         | 26.76                       | 7.95                                 | -   | -   |
| G342      | 6/18/2008     | NI                | Oyster | 19.52                         | 26.76                       | 7.01                                 | -   | -   |

|      |           |    |          |       |       |       |   |   |
|------|-----------|----|----------|-------|-------|-------|---|---|
| G348 | 6/18/2008 | OR | Water    | 20.80 | 23.60 | 8.79  | - | - |
| G358 | 7/1/2008  | NI | Oyster   | 20.51 | 24.61 | 9.30  | - | - |
| G360 | 7/1/2008  | NI | Oyster   | 20.51 | 24.61 | 9.30  | - | - |
| G363 | 7/1/2008  | OR | Water    | 21.96 | 22.41 | 6.64  | - | - |
| G365 | 7/1/2008  | OR | Oyster   | 21.96 | 22.41 | 8.19  | - | - |
| G368 | 7/1/2008  | OR | Water    | 21.96 | 22.41 | 6.64  | - | - |
| G377 | 7/1/2008  | NI | Water    | 20.51 | 24.61 | 8.26  | - | - |
| G385 | 7/16/2008 | NI | Water    | 22.40 | 27.17 | 7.60  | - | - |
| G387 | 7/16/2008 | NI | Water    | 22.40 | 27.17 | 7.60  | - | - |
| G389 | 7/16/2008 | OR | Oyster   | 24.46 | 25.63 | 5.65  | - | - |
| G399 | 7/16/2008 | OR | Water    | 24.46 | 25.63 | 5.65  | - | - |
| G401 | 7/16/2008 | OR | Oyster   | 24.46 | 25.63 | 5.65  | - | - |
| G407 | 7/16/2008 | NI | Oyster   | 22.40 | 27.17 | 6.33  | - | - |
| G409 | 7/16/2008 | NI | Oyster   | 22.40 | 27.17 | 6.33  | - | - |
| G412 | 7/16/2008 | OR | Water    | 24.46 | 25.63 | 5.65  | - | - |
| G416 | 7/16/2008 | NI | Water    | 22.40 | 27.17 | 7.60  | - | - |
| G422 | 7/16/2008 | NI | Oyster   | 22.40 | 27.17 | 6.33  | - | - |
| G426 | 7/16/2008 | NI | Oyster   | 22.40 | 27.17 | 6.33  | - | - |
| G430 | 7/30/2008 | NI | Water    | 22.8  | 16.64 | 9.00  | - | - |
| G438 | 7/30/2008 | NI | Oyster   | 22.8  | 16.64 | 6.24  | - | - |
| G441 | 7/30/2008 | NI | Oyster   | 22.8  | 16.64 | 6.24  | - | - |
| G445 | 7/30/2008 | NI | Water    | 22.8  | 16.64 | 9.00  | - | - |
| G451 | 7/30/2008 | OR | Water    | 22.94 | 14.26 | 9.27  | - | - |
| G452 | 7/30/2008 | OR | Water    | 22.94 | 14.26 | 9.27  | - | - |
| G454 | 7/30/2008 | OR | Water    | 22.94 | 14.26 | 9.27  | - | - |
| G461 | 7/30/2008 | OR | Water    | 22.94 | 14.26 | 9.27  | - | - |
| G467 | 8/5/2008  | NI | Water    | 22.17 | 12.72 | 6.94  | - | - |
| G478 | 7/30/2008 | NI | Sediment | 22.8  | 16.64 | 7.36  | - | - |
| G486 | 7/30/2008 | OR | Sediment | 22.94 | 14.26 | 7.61  | - | - |
| G487 | 7/30/2008 | NI | Sediment | 22.8  | 16.64 | 7.36  | - | - |
| G489 | 8/5/2008  | OR | Sediment | 22.14 | 15.84 | 7.19  | - | - |
| G501 | 8/5/2008  | NI | Sediment | 22.17 | 12.72 | 7.23  | - | - |
| G507 | 8/12/2008 | OR | Oyster   | 20.92 | 8.90  | 7.15  | - | - |
| G524 | 8/12/2008 | NI | Oyster   | 20.92 | 8.90  | 7.01  | - | - |
| G535 | 8/21/2008 | NI | Water    | 21.09 | 16.76 | 5.65  | - | - |
| G552 | 8/21/2008 | OR | Sediment | 21.2  | 14.7  | 14.16 | - | - |
| G574 | 8/28/2008 | OR | Water    | 21.05 | 20.94 | 7.53  | - | - |
| G575 | 8/28/2008 | OR | Water    | 21.05 | 20.94 | 7.53  | - | - |
| G594 | 9/1/2008  | NI | Water    | 20.21 | 24.59 | 9.27  | - | - |
| G595 | 9/1/2008  | OR | Water    | 21.15 | 24.65 | 12.82 | - | - |
| G599 | 9/1/2008  | OR | Water    | 21.15 | 24.65 | 12.82 | - | - |
| G623 | 8/28/2008 | NI | Oyster   | 20.55 | 22.35 | 5.4   | - | - |
| G632 | 9/10/2008 | NI | Oyster   | 20.87 | 14.15 | 8.84  | - | - |

|        |            |    |          |       |       |       |   |   |
|--------|------------|----|----------|-------|-------|-------|---|---|
| G633   | 9/10/2008  | NI | Water    | 20.87 | 14.15 | 7.75  | - | - |
| G639   | 9/10/2008  | OR | Oyster   | 21.6  | 8.4   | 7.34  | - | - |
| G640   | 9/10/2008  | OR | Oyster   | 21.6  | 8.4   | 7.34  | - | - |
| G645   | 9/10/2008  | OR | Water    | 21.6  | 8.4   | 6.65  | - | - |
| G650   | 9/19/2008  | OR | Sediment | 17.25 | 16.05 | 7.23  | - | - |
| G653   | 9/19/2008  | OR | Sediment | 17.25 | 16.05 | 7.23  | - | - |
| G657   | 9/19/2008  | NI | Sediment | 17.03 | 19.86 | 8.07  | - | - |
| G659   | 9/19/2008  | NI | Sediment | 17.03 | 19.86 | 8.07  | - | - |
| G660   | 9/19/2008  | NI | Water    | 17.03 | 19.86 | 7.19  | - | - |
| G669   | 9/24/2008  | NI | Oyster   | 16.37 | 22.78 | 6.94  | - | - |
| G677   | 9/24/2008  | OR | Oyster   | 16.29 | 20.75 | 8.13  | - | - |
| G681   | 9/24/2008  | NI | Water    | 16.37 | 22.78 | 7.66  | - | - |
| G683   | 9/24/2008  | OR | Water    | 16.29 | 20.75 | 7.01  | - | - |
| G690   | 10/1/2008  | OR | Sediment | 16.47 | 9.75  | 8.01  | - | - |
| G691   | 10/1/2008  | OR | Sediment | 16.47 | 9.75  | 8.01  | - | - |
| G693   | 10/1/2008  | NI | Sediment | 16.60 | 16.09 | 7.01  | - | - |
| G694   | 10/1/2008  | NI | Sediment | 16.60 | 16.09 | 7.01  | - | - |
| G702   | 10/8/2008  | NI | Water    | 13.75 | 15.65 | 9.30  | - | - |
| G703   | 10/8/2008  | NI | Oyster   | 13.75 | 15.65 | 7.79  | - | - |
| G707   | 10/8/2008  | OR | Oyster   | 13.69 | 13.71 | 8.79  | - | - |
| G709   | 10/8/2008  | OR | Water    | 13.69 | 13.71 | 14.16 | - | - |
| G710   | 10/8/2008  | OR | Oyster   | 13.69 | 13.71 | 8.79  | - | - |
| G715   | 10/15/2008 | NI | Sediment | 14.26 | 17.41 | 8.19  | - | - |
| G723   | 10/15/2008 | NI | Water    | 14.26 | 17.41 | 6.64  | - | - |
| G725   | 10/15/2008 | OR | Water    | 14.16 | 19.96 | 5.97  | - | - |
| G727   | 10/15/2008 | OR | Water    | 14.16 | 19.96 | 5.97  | - | - |
| G729   | 10/29/2008 | NI | Sediment | 10.60 | 15.22 | 5.33  | - | - |
| G731   | 10/29/2008 | NI | Sediment | 10.60 | 15.22 | 5.33  | - | - |
| G732   | 10/29/2008 | OR | Sediment | 10.76 | 19.69 | 7.60  | - | - |
| G733   | 10/29/2008 | OR | Sediment | 10.76 | 19.69 | 7.60  | - | - |
| G734   | 10/29/2008 | OR | Sediment | 10.76 | 19.69 | 7.60  | - | - |
| G735   | 10/29/2008 | OR | Sediment | 10.76 | 19.69 | 7.60  | - | - |
| G739   | 10/29/2008 | NI | Water    | 10.60 | 15.22 | 5.41  | - | - |
| G745   | 11/12/2008 | OR | Oyster   | 8.66  | 17.44 | 6.18  | - | - |
| G747   | 11/12/2008 | OR | Water    | 8.66  | 17.44 | 7.61  | - | - |
| G749   | 11/12/2008 | OR | Water    | 8.66  | 17.44 | 7.61  | - | - |
| G752   | 11/12/2008 | OR | Sediment | 8.66  | 17.44 | 7.36  | - | - |
| G755   | 11/12/2008 | OR | Sediment | 8.66  | 17.44 | 7.36  | - | - |
| G756   | 11/12/2008 | NI | Sediment | 8.97  | 19.62 | 6.68  | - | - |
| G760   | 12/8/2008  | OR | Water    | 1.1   | 9.9   | 12.82 | - | - |
| G762   | 12/8/2008  | OR | Sediment | 1.1   | 9.9   | 9.00  | - | - |
| G766   | 12/8/2008  | NI | Sediment | -0.7  | 12.3  | 7.78  | - | - |
| G1216b | 9/1/2009   | OR | Sediment | 20.83 | 20.79 | 6.56  | - | - |

|        |            |    |          |       |       |      |   |   |
|--------|------------|----|----------|-------|-------|------|---|---|
| G1217  | 9/1/2009   | OR | Sediment | 20.83 | 20.79 | 6.56 | - | - |
| G1219  | 9/1/2009   | OR | Sediment | 20.83 | 20.79 | 6.56 | - | - |
| G1221  | 9/1/2009   | OR | Sediment | 20.83 | 20.79 | 6.56 | - | - |
| G1226  | 9/1/2009   | OR | Sediment | 20.83 | 20.79 | 6.56 | - | - |
| G1256  | 9/1/2009   | NI | Sediment | 19.95 | 23.61 | 6.63 | - | - |
| G1256d | 9/1/2009   | NI | Sediment | 19.95 | 23.61 | 6.63 | - | - |
| G1258  | 9/1/2009   | NI | Sediment | 19.95 | 23.61 | 6.63 | - | - |
| G1282  | 9/15/2009  | OR | Oyster   | 18.70 | 23.10 | 8.00 | - | - |
| G1286  | 9/15/2009  | OR | Oyster   | 18.70 | 23.10 | 8.00 | - | - |
| G1300  | 9/15/2009  | OR | Sediment | 18.70 | 23.10 | 8.40 | - | - |
| G1304  | 9/15/2009  | OR | Sediment | 18.70 | 23.10 | 8.40 | - | - |
| G1304b | 9/15/2009  | OR | Sediment | 18.70 | 23.10 | 8.40 | - | - |
| G1305  | 9/15/2009  | OR | Sediment | 18.70 | 23.10 | 8.40 | - | - |
| G1306  | 9/15/2009  | OR | Sediment | 18.70 | 23.10 | 8.40 | - | - |
| G1318  | 9/15/2009  | OR | Water    | 18.70 | 23.10 | 8.00 | - | - |
| G1319  | 9/15/2009  | OR | Water    | 18.70 | 23.10 | 8.00 | - | - |
| G1334  | 9/15/2009  | NI | Oyster   | 18.80 | 25.60 | 9.80 | - | - |
| G1338  | 9/15/2009  | NI | Oyster   | 18.80 | 25.60 | 9.80 | - | - |
| G1338b | 9/15/2009  | NI | Oyster   | 18.80 | 25.60 | 9.80 | - | - |
| G1339  | 9/15/2009  | NI | Oyster   | 18.80 | 25.60 | 9.80 | - | - |
| G1340  | 9/15/2009  | NI | Oyster   | 18.80 | 25.60 | 9.80 | - | - |
| G1347  | 9/15/2009  | NI | Oyster   | 18.80 | 25.60 | 9.80 | - | - |
| G1350  | 9/15/2009  | NI | Oyster   | 18.80 | 25.60 | 9.80 | - | - |
| G1355  | 9/15/2009  | NI | Sediment | 18.80 | 25.60 | 8.60 | - | - |
| G1361  | 9/15/2009  | NI | Sediment | 18.80 | 25.60 | 8.60 | - | - |
| G1382  | 10/26/2009 | NI | Oyster   | 10.10 | 26.30 | 7.68 | - | - |
| G1383  | 10/26/2009 | NI | Oyster   | 10.10 | 26.30 | 7.68 | - | - |
| G1384  | 10/26/2009 | NI | Oyster   | 10.10 | 26.30 | 7.68 | - | - |
| G1385  | 10/26/2009 | NI | Oyster   | 10.10 | 26.30 | 7.68 | - | - |
| G1386  | 10/26/2009 | NI | Oyster   | 10.10 | 26.30 | 7.68 | - | - |
| G1388  | 10/26/2009 | OR | Oyster   | 10.10 | 24.80 | 7.70 | - | - |
| G1389  | 10/26/2009 | OR | Oyster   | 10.10 | 24.80 | 7.70 | - | - |
| G1390  | 10/26/2009 | OR | Oyster   | 10.10 | 24.80 | 7.70 | - | - |
| G1391  | 10/26/2009 | OR | Oyster   | 10.10 | 24.80 | 7.70 | - | - |
| G1393  | 10/26/2009 | OR | Oyster   | 10.10 | 24.80 | 7.70 | - | - |
| G1394  | 10/26/2009 | OR | Oyster   | 10.10 | 24.80 | 7.70 | - | - |
| G1395  | 10/26/2009 | OR | Oyster   | 10.10 | 24.80 | 7.70 | - | - |
| G1397  | 10/26/2009 | NI | Sediment | 10.10 | 26.30 | 7.22 | - | - |
| G1399  | 10/26/2009 | NI | Sediment | 10.10 | 26.30 | 7.22 | - | - |
| G1400  | 10/26/2009 | NI | Sediment | 10.10 | 26.30 | 7.22 | - | - |
| G1404  | 10/26/2009 | NI | Sediment | 10.10 | 26.30 | 7.22 | - | - |
| G1405  | 10/26/2009 | NI | Sediment | 10.10 | 26.30 | 7.22 | - | - |
| G1418  | 10/26/2009 | OR | Sediment | 10.10 | 24.80 | 7.90 | - | - |

|       |            |    |          |       |       |      |   |   |
|-------|------------|----|----------|-------|-------|------|---|---|
| G1425 | 10/26/2009 | OR | Sediment | 10.10 | 24.80 | 7.90 | - | - |
| G1440 | 11/19/2009 | NI | Oyster   | 8.50  | 19.90 | 7.28 | - | - |
| G1444 | 11/19/2009 | OR | Oyster   | 7.90  | 15.70 | 8.10 | - | - |
| G1445 | 11/19/2009 | OR | Oyster   | 7.90  | 15.70 | 8.10 | - | - |
| G1449 | 11/19/2009 | NI | Sediment | 8.50  | 19.90 | 6.70 | - | - |
| G1458 | 11/19/2009 | OR | Sediment | 7.90  | 15.70 | 6.51 | - | - |
| G1463 | 11/19/2009 | OR | Sediment | 7.90  | 15.70 | 6.51 | - | - |
| G1465 | 11/19/2009 | OR | Sediment | 7.90  | 15.70 | 6.51 | - | - |
| G1474 | 12/7/2009  | NI | Oyster   | 5.00  | 11.8  | 6.63 | - | - |
| G1476 | 12/7/2009  | NI | Oyster   | 5.00  | 11.8  | 6.63 | - | - |
| G1477 | 12/7/2009  | NI | Oyster   | 5.00  | 11.8  | 6.63 | - | - |
| G1478 | 12/7/2009  | NI | Oyster   | 5.00  | 11.8  | 6.63 | - | - |
| G1479 | 12/7/2009  | NI | Oyster   | 5.00  | 11.8  | 6.63 | - | - |
| G1480 | 12/7/2009  | OR | Oyster   | 5.00  | 10.2  | 6.56 | - | - |
| G1481 | 12/7/2009  | OR | Oyster   | 5.00  | 10.2  | 6.56 | - | - |
| G1487 | 12/7/2009  | OR | Oyster   | 5.00  | 10.2  | 6.56 | - | - |
| G1488 | 12/7/2009  | NI | Sediment | 5.00  | 11.8  | 7.00 | - | - |
| G1489 | 12/7/2009  | NI | Sediment | 5.00  | 11.8  | 7.00 | - | - |
| G1490 | 12/7/2009  | NI | Sediment | 5.00  | 11.8  | 7.00 | - | - |
| G1491 | 12/7/2009  | NI | Sediment | 5.00  | 11.8  | 7.00 | - | - |
| G1493 | 12/7/2009  | NI | Sediment | 5.00  | 11.8  | 7.00 | - | - |
| G1494 | 12/7/2009  | NI | Sediment | 5.00  | 11.8  | 7.00 | - | - |
| G1503 | 12/7/2009  | OR | Sediment | 5.00  | 10.2  | 6.56 | - | - |
| G1504 | 12/7/2009  | OR | Sediment | 5.00  | 10.2  | 6.56 | - | - |
| G1508 | 12/7/2009  | OR | Sediment | 5.00  | 10.2  | 6.56 | - | - |

<sup>a</sup> NI = Nannie Island; OR = Oyster River; FP = Fox Point

<sup>b</sup> Phenotypes were measured at the source of isolation.

Table S2: Sources and virulence characteristics of *V. parahaemolyticus* clinical strains used in this study.

| Strain(s)    | Taxon Object ID <sup>a</sup> | Source                     | Serotype | trh | tdh | Reference              |
|--------------|------------------------------|----------------------------|----------|-----|-----|------------------------|
| RIMD 2210633 | 637000335                    | Patient, 1996 (Japan)      | O3:K6    | -   | +   | Makino et al., 2003    |
| AQ3810       | 640963009                    | Patient, 1983 (Japan)      | O3:K6    | -   | +   | Boyd et al., 2008      |
| AN-5034      | 648276755                    | Patient, 1998 (Bangladesh) | O4:K68   | -   | +   | Matsumoto et al., 2000 |
| AQ4037       | 648276756                    | Patient, 1985 (Maldives)   | O3:K6    | +   | -   | Chen et al., 2011      |

<sup>a</sup> Accessed at Integrated Microbial Genomes from JGI (<http://img.jgi.doe.gov/cgi-bin/w/main.cgi>)

## References

- Boyd, E.F., A.L. Cohen, L. M. Naughton, D.W. Ussery, T.T. Binnewies, O.C. Stine, M.A. Parent. 2008. Molecular analysis of the emergence of pandemic *Vibrio parahaemolyticus*. BMC Microbiol. 8:110
- Chen Y, O.C. Stine, J.H. Badger, A.I. Gil, G.B. Nair, M. Nishibuchi, and D.E. Fouts. 2011. Comparative genomic analysis of *Vibrio parahaemolyticus*: serotype conversion and virulence. BMC Genomics. 12: 294
- Makino K., K. Oshima, K. Kurokawa, K. Yokoyama, T. Uda, K. Tagomori, Y. Iijima, M. Najima, M. Nakano, A. Yamashita, Y. Kubota, S. Kimura, T. Yasunaga, T. Honda, H. Shinagawa, M. Hattori, and T. Iida. 2003. Genome sequence of *Vibrio parahaemolyticus*: a pathogenic mechanism distinct from that of *V. cholerae*. Lancet. 361: 743-9
- Matsumoto C., J. Okuda, M. Ishibashi, M. Iwanaga, P. Garg, T. Rammamurthy, H.C. Wong, A. Depaola, Y.B. Kim, M.J. Albert, and M. Nishibuchi. 2000. Pandemic spread of an O3:K6 clone of *Vibrio parahaemolyticus* and emergence of related strains evidenced by arbitrarily primed PCR and *toxRS* sequence analyses. J Clin Microbiol. 38: 578–585

Table S3: Comparison of the GBE *V. parahaemolyticus* populations to other populations worldwide. MLSA details and sequence information was obtained from pubMLST (<http://pubmlst.org/vparahaemolyticus/>).

|                              | Total Isolates | Number of Environmental, Clinical Isolates <sup>a</sup> | Total STs <sup>b</sup> | Number of Clonal Complexes | Number of Unique Isolates | Unique Isolates (%) | Overall Diversity <sup>c</sup> |
|------------------------------|----------------|---------------------------------------------------------|------------------------|----------------------------|---------------------------|---------------------|--------------------------------|
| GBE                          | 192            | 192, 0                                                  | 159                    | 15                         | 150                       | 78.13               | 0.017<br>(0.002)               |
| <u>Worldwide collection:</u> | 806            | 485, 428                                                | 357                    | 12                         | 622                       | 77.17               | 0.018<br>(0.002)               |
| China                        | 198            | 135, 98                                                 | 142                    | 14                         | 129                       | 65.15               | 0.016<br>(0.002)               |
| Thailand                     | 133            | 96, 49                                                  | 71                     | 22                         | 49                        | 36.84               | 0.022<br>(0.002)               |
| <u>USA:</u>                  | 200            | 210, 48                                                 | 99                     | 27                         | 72                        | 36.00               | 0.016<br>(0.002)               |
| AK                           | 14             | 14, 0                                                   | 11                     | 3                          | 8                         | 57.14               | 0.015<br>(0.002)               |
| AL                           | 11             | 11, 0                                                   | 9                      | 2                          | 7                         | 63.64               | 0.008<br>(0.001)               |
| LA                           | 34             | 34, 0                                                   | 27                     | 2                          | 25                        | 73.53               | 0.012<br>(0.001)               |
| MS                           | 29             | 29, 0                                                   | 17                     | 6                          | 11                        | 37.93               | 0.012<br>(0.001)               |
| WA (statewide)               | 76             | 44, 32                                                  | 27                     | 9                          | 18                        | 23.68               | 0.016<br>(0.002)               |
| WA (Hood's Canal)            | 21             | 12, 8                                                   | 4                      | 2                          | 3                         | 14.29               | 0.015<br>(0.002)               |

<sup>a</sup> Environmental, Clinical

<sup>b</sup> ST = sequence type

<sup>c</sup> Parentheses are standard error calculated using the Nei-Gojobori method and Jukes-Cantor correction with 500 bootstrap replications.

Table S4: Population details of *V. parahaemolyticus* isolates in the GBE.

| Collection Factor        | Number of Isolates | Number of STs <sup>a</sup> | Number of Clonal Complexes | Overall Diversity <sup>b</sup> |
|--------------------------|--------------------|----------------------------|----------------------------|--------------------------------|
| Year: 2007               | 29                 | 27                         | 2                          | 0.014 (0.001)                  |
| Year: 2008               | 94                 | 77                         | 10                         | 0.013 (0.001)                  |
| Year: 2009               | 69                 | 54                         | 9                          | 0.013 (0.001)                  |
| Site: Nannie Island (NI) | 95                 | 81                         | 9                          | 0.013 (0.001)                  |
| Site: Oyster River (OR)  | 95                 | 84                         | 7                          | 0.013 (0.001)                  |
| Source: Water            | 52                 | 47                         | 3                          | 0.014 (0.001)                  |
| Source: Sediment         | 61                 | 49                         | 8                          | 0.013 (0.001)                  |
| Source: Oyster           | 79                 | 73                         | 4                          | 0.013 (0.001)                  |

<sup>a</sup> ST = sequence type

<sup>b</sup> Parentheses are standard error calculated using the Nei-Gojobori method and Jukes-Cantor correction with 500 bootstrap replications.
